# Supplementary material
Source: HighWire-hosted journal article supplement (doi:10.1101/rna.053207.115)
Supplement: SuppLegends.docx [file SuppLegends.docx]

Supplementary Table 1. Oligonucleotide primer pairs used in site-directed mutagenesis reactions to make amino acid residue substitutions at the 7 known phosphorylation sites within Ago2.

Supplementary Figure 1. Ago2 mutants are expressed at comparable levels in transfected HeLa cells. HeLa cells were transiently transfected with plasmids expressing wild type or phospho-mutant Ago2, and dsGFP as a control. Cells were lysed 24 hours posttransfection and subjected to SDS-PAGE and immunoblotted for Ago, actin, and GFP. Signal intensities for Ago were normalized against the level of actin. The numbers below the blot indicate the relative expression of each exogenously expressed Ago2 phospho-mutant relative to the expression of wild type Ago2. Endogenous Ago is indicated by arrowhead.

Supplementary Figure 2. Number of P-bodies and stress granules in cells over-expressing exogenous Ago2. A. HeLa cells transiently transfected with plasmids expressing wild type or mutant Ago2 were processed for indirect immunofluorescence (IIF) microscopy. The numbers of Dcp1a-positive P-bodies were quantitated using quantitative laser scanning cytometry. The numbers of P-bodies in cells transfected with vector alone was compared to the number in cells expressing exogenous Ago2. C. HeLa cells were transiently co-transfected with plasmids expressing wild type or mutant Ago2. Prior to processing for IIF microscopy, cells were treated with 500 µM sodium arsenite for 1 hr. The numbers of stress granules positive for endogenous TIA-1 were determined using quantitative laser scanning cytometry. The numbers of stress granules in cells transfected with vector alone were compared to the numbers in cells expressing exogenous Ago2. Paired student’s two-tailed t-test was used to compare relative co-localization of mutant Ago2 and RNA granule to that of wildtype Ago2. Error bars indicate SE.

Supplementary Figure 3. Subcellular localization of Ago2 phospho-mutants. (A) HeLa cells were transiently transfected with plasmids encoding myc-tagged Ago2 individually mutated at each known phospho-site to prevent phosphorylation. Following treatment with 500 µM arsenite for 45 min, cells were processed for indirect immunofluorescence microscopy. (B) HeLa cells were transiently transfected with plasmids expressing myc-tagged Ago2 individually mutated at each known phospho-site to mimic phosphorylation. Following treatment with 500 µM arsenite for 45 min, cells were processed for indirect immunofluorescence microscopy. Dcp1a-positive P-bodies are marked with arrows, TIA-1-positive stress granules are marked with arrowheads. Bars, 15 µm.

Supplementary Figure 4. Interaction of myc-hAgo2 S798D with components of RNA granules. A. HeLa cells transiently transfected with plasmids encoding wild type or mutant Ago2 were lysed 16 h post-transfection and subjected to co-immunoprecipitation with anti-myc antibodies. Total cell lysate (Input) and bound fractions were subjected to SDS-PAGE and immunoblotted for Ago2 and Dcp1a as indicated. Enhanced contrast image of co-immunoprecipitated Dcp1a is provided.

Supplementary Figure 5. Expression level of myc-hAgo2 constructs in Ago2 -/- mouse embryonic fibroblasts. Cells were transiently electroporated with plasmids expressing wild type or phospho-mutant myc-hAgo2, and dsGFP as a control. Twenty-four hours later, cell lysates were prepared and then subjected to SDS-PAGE and immunoblotted for Ago, myc, actin, and GFP.
